# Supplementary material for: MCPIP1 ribonuclease exhibits broad-spectrum antiviral effects through viral RNA binding and degradation
Source: PubMed Central journal article supplement — Nucleic Acids Res. 2013 Jan 25;41(5):3314–26. doi: 10.1093/nar/gkt019 (PMC3597685; doi:10.1093/nar/gkt019), 2013-01-25

## **SUPPLEMENTARY DATA**

### **MCPIP1 ribonuclease exhibits broad-spectrum antiviral effects through viral**

#### **RNA binding and degradation**

Ren-Jye Lin<sup>1,2,\*</sup>, Hsu-Ling Chien<sup>3</sup>, Shyr-Yi Lin<sup>1,2</sup>, Bi-Lan Chang<sup>3,4</sup>, Han-Pang Yu<sup>3</sup>,  
Wei-Chun Tang<sup>3,5</sup> and Yi-Ling Lin<sup>3,4,5,\*</sup>

<sup>1</sup>Department of General Medicine, School of Medicine, College of Medicine, Taipei Medical University, Taipei, Taiwan; <sup>2</sup>Department of Primary Care Medicine, Taipei Medical University Hospital, Taipei, Taiwan; <sup>3</sup>Institute of Biomedical Sciences, Academia Sinica, Taipei, Taiwan; <sup>4</sup>Genomics Research Center, Academia Sinica, Taipei, Taiwan; <sup>5</sup>Graduate Institute of Life Sciences, National Defense Medical Center, Taipei, Taiwan

\*Corresponding author: Ren-Jye Lin (linrenjy@ms67.hinet.net) or Yi-Ling Lin (yll@ibms.sinica.edu.tw)

## SUPPLEMENTARY MATERIALS & METHODS

**Lactate dehydrogenase (LDH) assay.** Cell cytotoxicity was assessed by the release of the cytoplasmic enzyme LDH using a commercial kit (Cytotoxicity Detection Kit; Roche) according to the manufacturer's instructions.

**Plasmids construction.** MCPIP1-C306R mutant was generated by single-primer PCR method (31) by using primer annealing to MCPIP1 cDNA with the mutated codons underlined:

5'-GAGCACAGGAAGCAGCCGCGTCCCTATGGAAGGAAATGCAC-3'. For *in vitro* synthesis of truncated JEV RNAs, JEV cDNA plasmids ( $\Delta$ 2520-7116,  $\Delta$ 290-5863,  $\Delta$ 6965-10910, and  $\Delta$ 2811-10044) were obtained from SP6-driven JEV RP-9 infectious clone plasmid by restriction enzymes digestion. All of the constructs were generated using standard molecular cloning techniques and verified by DNA sequencing.

**Reverse Transcriptase Polymerase Chain Reaction (RT-PCR).** Total cellular RNA was isolated from A549 cells by using RNeasy Total RNA kit according to the manufacturer's protocol (Qiagen). RT-PCR was carried out with 1~2  $\mu$ g of RNA by using the ThermoScript RT-PCR System (Invitrogen) using oligo(dT)<sub>20</sub> as a primer. Gene expression was determined by using the following TaqMan primers/probes mixes (Applied Biosystems) with TaqMan Gene Expression Assay ID: MCPIP1:

Hs00962356\_m1, IL-1 $\beta$ : Hs02758991\_g1, IL-6: Hs00985639\_m1, TNF- $\alpha$ : Hs01113624\_g1, MCP-1: Hs00234140\_m1 and GAPDH: Hs02758991\_g1. The real-time RT-PCR was performed using an ABI-Prism 7500 Sequence Detector system (Applied Biosystems). The relative mRNA levels were normalized to GAPDH internal control. For Stat1 and IRF-9 expression, total RNA was extracted and examined by RT-PCR using the specific primers for human Stat1 (5'-ATGTCTCAGTGGTACGAACTTCA-3' and 5'-ACTCTTTGCCACACCATTG-3'), IRF-9 (5'-CGGAGTGTGCTGGGATGAT-3' and 5'-TCAGCAACATCCATGCGGC-3'), and  $\beta$ -actin (5'-TCCTGTGGCATCCACGAAACT-3' and 5'-GAAGCATTGCGGTGGACGAT-3'), respectively. Amplification reactions were run in a total volume of 25  $\mu$ l for 25 cycles by using a T3000 Thermal Cycler (Biometra), and then the amplified PCR products were analyzed by 2% agarose gel electrophoresis.

#### **SUPPLEMENTARY FIGURE LEGENDS**

**Figure S1.** No cytotoxicity was induced in T-REx-293 cells with MCPIP1 over-expression. T-REx-293 cells were seeded at a high density of  $8 \times 10^5$  cells per well of 12-well plate and cultured in medium without (-) or with (+) Dox (1  $\mu$ g/ml)

for the indicated times. **(A)** The degree of cytotoxicity was measured by LDH release by using a commercial kit. **(B)** Cell survival rate was measured by trypan blue exclusion using Countess® Automated Cell Counter (Invitrogen). Values are shown as mean  $\pm$  SD for three independent experiments.

**Figure S2.** RNase activity of human MCPIP1 is essential for its antiviral effect against JEV and DEN-2 infection. Human T-REx-293 cells with inducible expression of vector, MCPIP1, or MCPIP1-D141N mutant were cultured in medium without (-) or with (+) Dox (1  $\mu$ g/ml) for 12 h, then infected with JEV or DEN-2 (MOI 5). At 24 h post-infection, cells were fixed and permeabilized for immunofluorescence assay of viral protein NS1 (green) expression for JEV **(A)** and DEN-2 **(B)**. Nuclei were stained with DAPI (blue). **(C)** The representative JEV plaque forming images were stained with crystal violet.

**Figure S3.** Human MCPIP1 blocks the reporter expression of JEV and DEN-2 replicons. Human T-REx-293 cells with WT or MCPIP1-D141N mutant were cultured in the absence (-) or presence (+) of Dox (1  $\mu$ g/ml) for 12 h, and then transfected with JEV or DEN-2 replicon constructs as outlined. The cell lysates were harvested at 24 h post-transfection and the luciferase activities of JEV **(A)** or DEN-2 **(B)** replicons were determined using a Luciferase Assay System Kit (Promega). The luciferase activities derived from JEV and DEN-2 replicons are shown as means and standard deviations

of three independent experiments and were compared by two-tailed Student's *t*-tests. \*

$P \leq 0.05$ ; \*\* $P \leq 0.01$ ; NS: not significant.

**Figure S4.** The proline-rich domain of human MCPIP1 is essential for its antiviral activity against JEV and DEN-2 infection. Human T-REx-293 cells with vector, WT or MCPIP1- $\Delta$ 458-536 mutant were cultured without (-) or with (+) Dox (1  $\mu$ g/ml) for 12 h, then infected with JEV or DEN-2 (MOI 5) for 24 h. Virus titers of JEV (**A**) and DEN-2 (**B**) are means and standard deviations of two independent experiments. The titers were compared by two-tailed Student's *t*-tests. \*  $P \leq 0.05$ ; NS: not significant.

**Figure S5.** The human MCPIP1-C306R mutant partially loses its antiviral activity against JEV and DEN-2 infection. Human T-REx-293 cells with inducible expression of vector, MCPIP1, or MCPIP1-C306R mutant were cultured in medium without (-) or with (+) Dox (1  $\mu$ g/ml) for 12 h, then infected with JEV or DEN-2 (MOI 5) for 24 h. (**A, B**) Western blot analysis of protein expression of HA for MCPIP1, JEV NS3, DEN-2 NS3, and actin. (**C, D**) Cells were fixed and permeabilized for immunofluorescence assay of viral protein NS1 (green) expression for JEV (**C**) and DEN-2 (**D**). Nuclei were stained with DAPI (blue). (**E, F**) Human T-REx-293 cells with WT or MCPIP1-C306R mutant were infected with JEV or DEN-2 (MOI 5) for 18 h, then cultured in medium without (-) or with (+) Dox (1  $\mu$ g/ml) for 18 h. The viral RNA bound with MCPIP1 protein was pulled down with HA-beads and

amplified by RT-PCR with JEV (**E**) or DEN-2 (**F**) 3'-UTR specific primers (middle panels). RT-PCR of mRNA levels of JEV and DEN-2 3'-UTR in virus-infected cells (bottom panels). Western blot analysis of HA-tagged MCPIP1 protein expression in cell lysates (top panels).

**Figure S6.** Subfragments of JEV RNA are degraded by human MCPIP1. *In vitro* transcribed full-length and various truncated JEV RNAs (1.5 µg) as indicated in the upper panel were incubated with HA-tagged WT or MCPIP1-D141N mutant proteins (~ 100 ng) in a reaction buffer with 5 mM Mg<sup>2+</sup> at 30 °C for 1 h. RNAs separated by electrophoresis in 0.8% agarose gel were detected by ethidium bromide staining. The photos are shown as inverse images.

**Figure S7.** Expression levels of TNF-α, IL-1β, MCP-1 and MCPIP1 in JEV- and DEN-2-infected cells. A549 cells were mock-infected, or infected with JEV (MOI 5) (**A**) or DEN-2 (MOI 5) (**B**) for the indicated times. The relative mRNA levels of the indicated genes were analyzed by quantitative real-time RT-PCR and normalized to that of GAPDH mRNA.

**Figure S8.** The human MCPIP1 is not inducible by type-I IFN. (**A**) Human A549 cells were treated with IL-1β (25 ng/ml) or IFN-α (1000 U/ml) for 3 h. The relative MCPIP1 mRNA levels were analyzed by quantitative real-time RT-PCR and normalized to that of GAPDH mRNA. (**B**) A549 cells were cultured in the presence

or absence of IFN- $\alpha$  (1000 U/ml) for 3 h. The induction of Stat1 and IRF-9 mRNA were analyzed by RT-PCR as described in Materials and Methods. The expected sizes of PCR fragments for each gene are shown on the right sides of the panels.

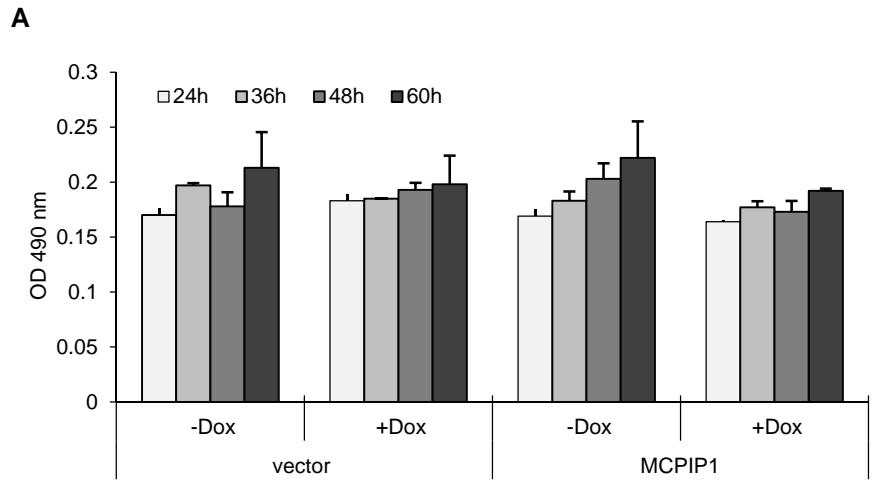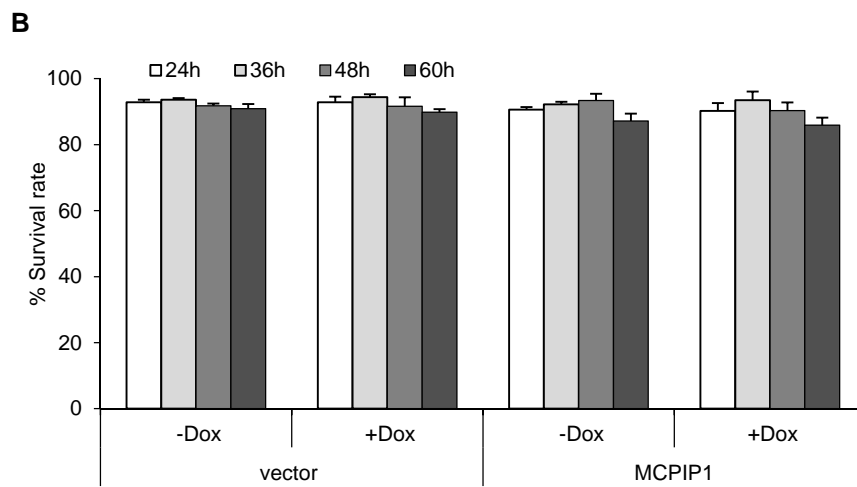



**A**

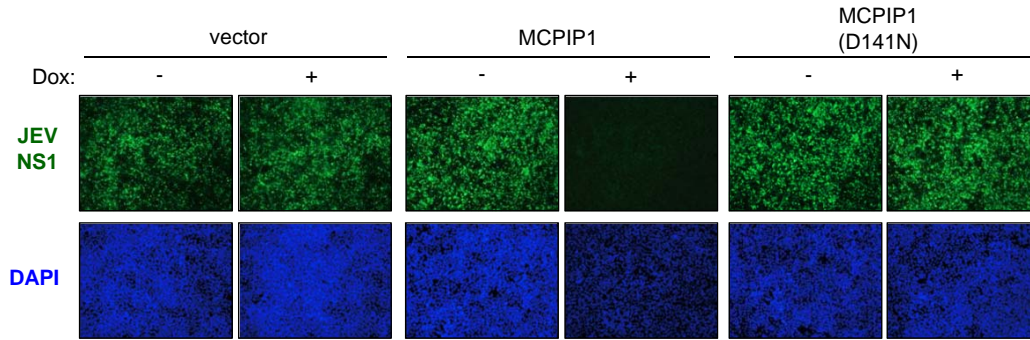

**B**

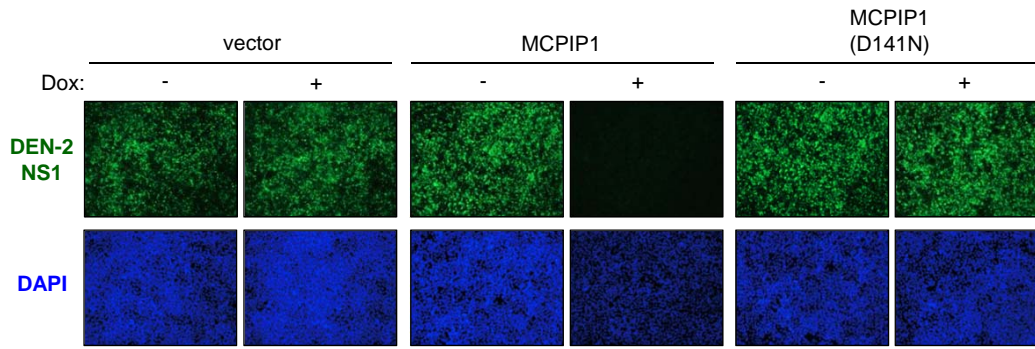

**C** JEV

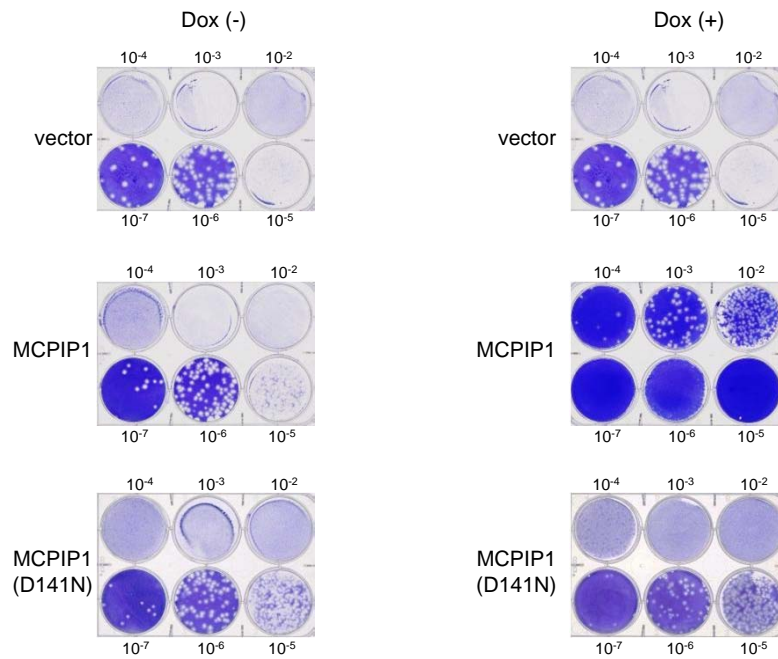

A.

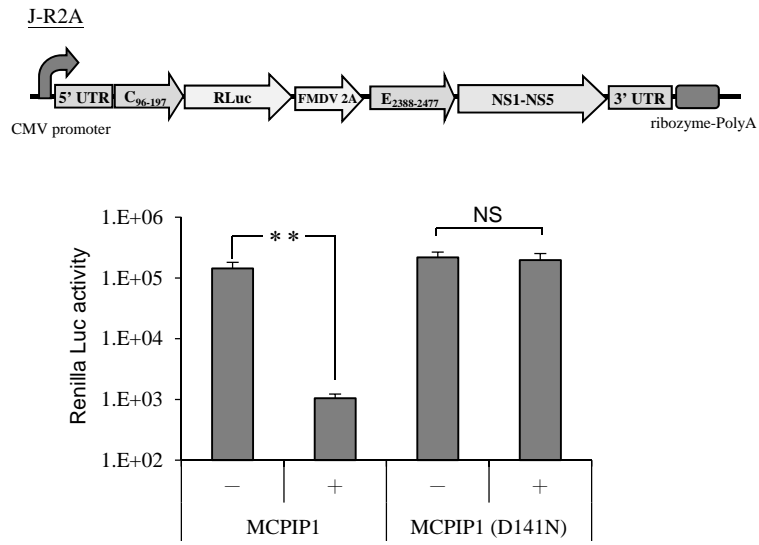

B.

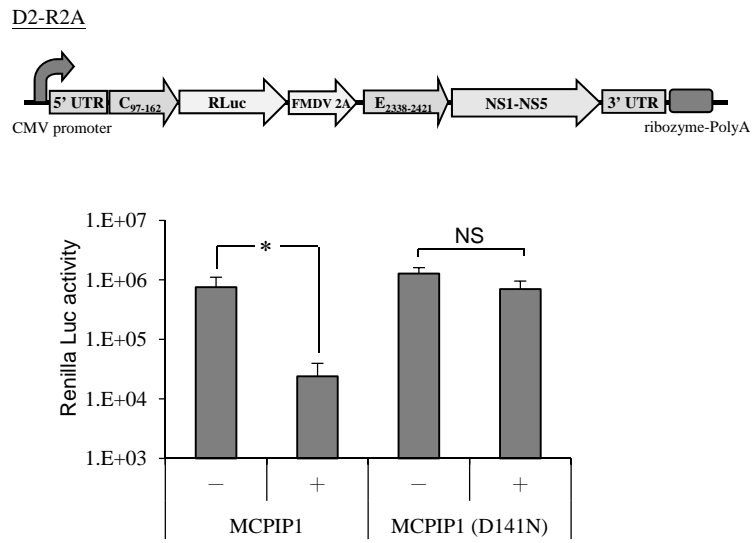

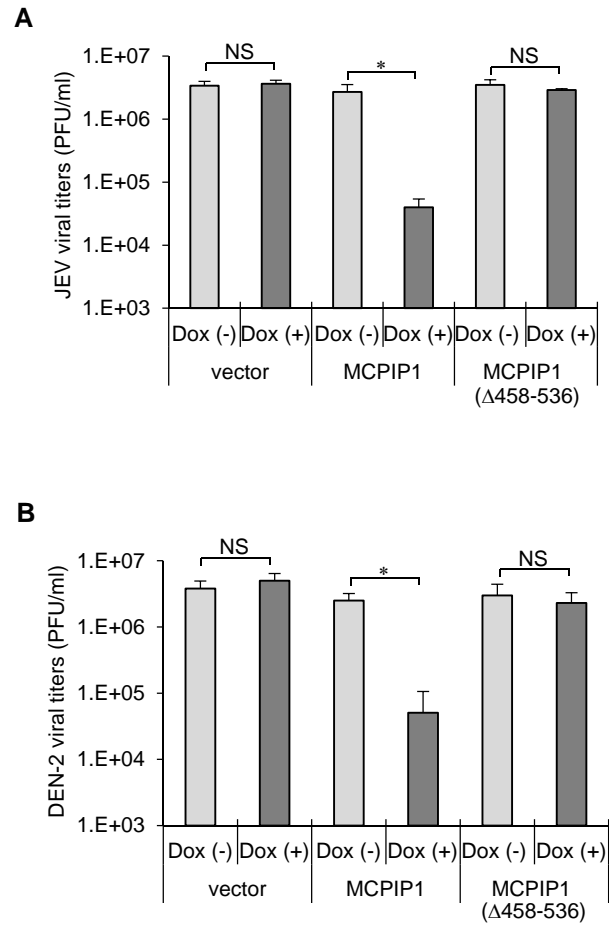

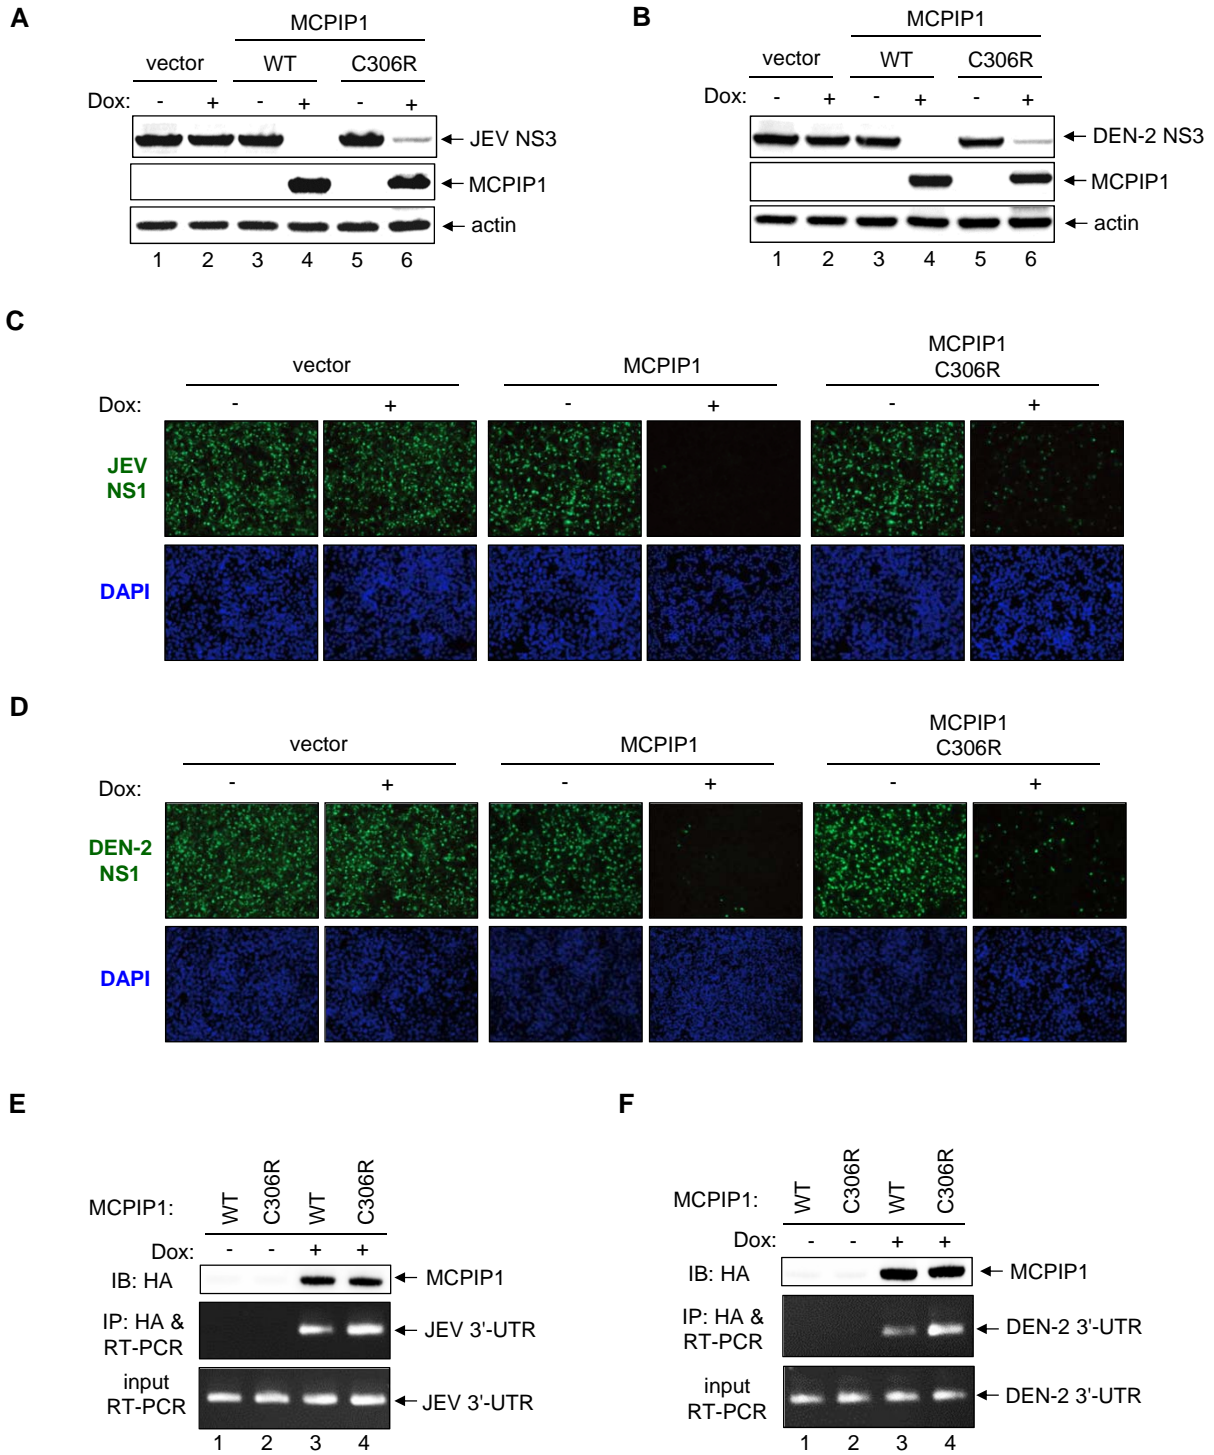

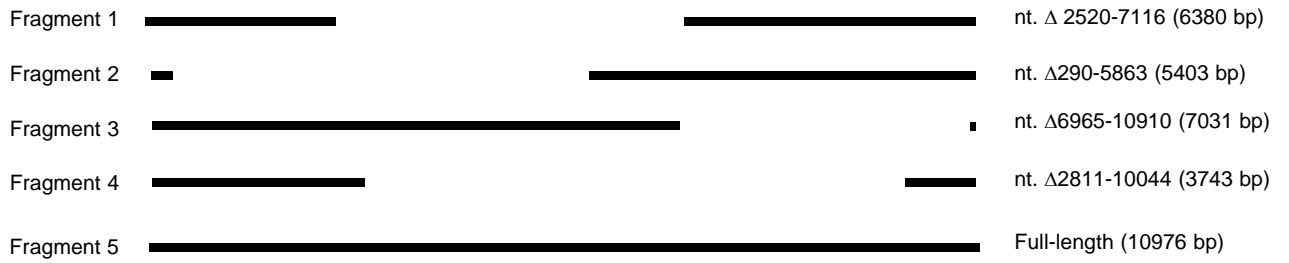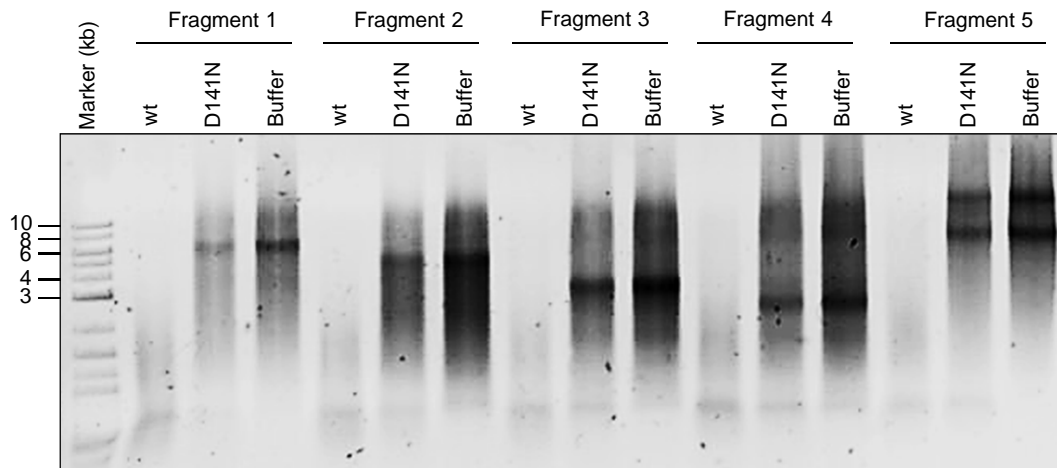

**A**

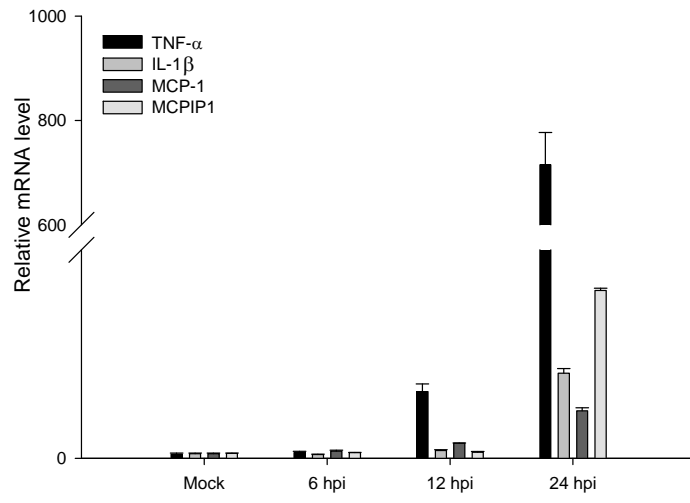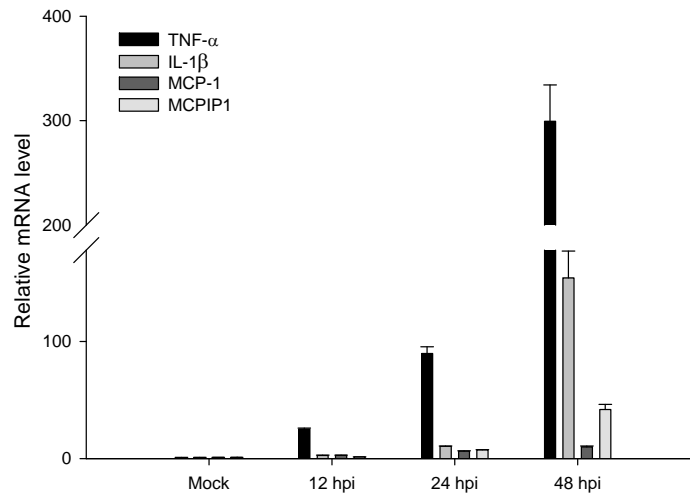

**A**

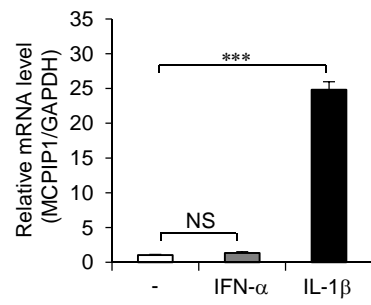

**B**

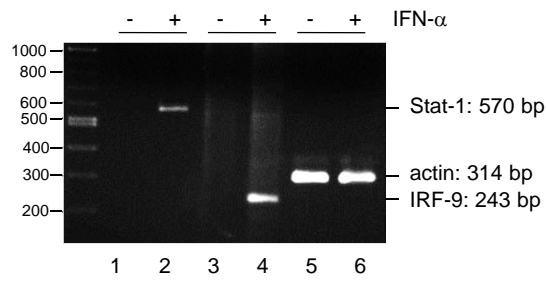

Supplement: supp_gkt019_nar-02737-v-2012-File009.pdf [file supp_gkt019_nar-02737-v-2012-File009.pdf]
